# Supplementary material
Source: PubMed Central journal article supplement (PMC11348803)
Supplement: NIHMS1704083-supplement-1.pdf [file NIHMS1704083-supplement-1.pdf]

532 **Supplementary Information:**

533 **Methods:**

534 No statistical methods were used to predetermine sample size and the investigators were not blinded to  
535 allocation during experiments and outcome assessment.

536

537 **Reprogramming and efficiency calculation:**

538 Passage three wild-type, heterozygous TauEGFP knock-in MEFs or human embryonic fibroblasts were  
539 infected with indicated lentivirus (available from us through Addgene or specified in Table S4) in MEF  
540 media containing 8 µg/ml polybrene (Sigma) for 16-20 h. Cells were switched into fresh MEF media  
541 containing 2 µg/ml doxycycline (Sigma) to induce transgene expression for 2 days. At day 3 cells were  
542 switched into N3 media (DMEM/F12) containing N2 supplement, B27, 20 µg/ml Insulin,  
543 penicillin/streptomycin (all from Invitrogen) and doxycycline to continue reprogramming. The media  
544 was changed every 2–3 days for the duration of the reprogramming. To calculate the efficiency of  
545 neuronal induction the total number of TauEGFP and/or TUJ1 expressing cells with complex neurite  
546 outgrowth (cells having a spherical cell body and at least one thin process three times the size of their  
547 cell body), were quantified manually 7 or 14 days after transgene induction by immunofluorescence  
548 microscopy. To calculate the efficiency of myocyte-like cells the total number of Desmin and MYH  
549 expressing cells was quantified manually 14 days after transgene induction by immunofluorescence  
550 microscopy. The quantification was based on the average number of neuronal or myocyte-like cells  
551 present in a minimum of 30 randomly selected 20x fields of view from at least three biological  
552 replicates. The number of reprogrammed cells was then either normalised to the number of  
553 reprogrammed cells in the control condition or to the total number of cells determined by DAPI staining.  
554 TauEGFP-expressing cells in Fig. 4a and ED9b were quantified using a LSRFortessa FACS analyser  
555 (BD Biosciences) based on the average number of TauEGFP positive cells detected in 60.000 to 120.000  
556 analysed cells from at least three to six biological replicates.

557

558 **In utero electroporation:**

559 All animal protocols have been approved by Stanford University. For in utero electroporation pregnant  
560 CD-1 mice (Charles River) were deeply anesthetized with Isoflurane (Henry Schein), after which the  
561 uterine horns were carefully exposed through a midline abdominal incision. pSico constructs encoding  
562 both GFP and indicated shRNA-oligos from the same DNA plasmid (1–2 µl of 2 µg/µl) were diluted in  
563 PBS containing 0.01% fast green (Sigma) as a tracer and injected in utero into the lateral ventricle of  
564 mouse embryos at E13.5 using a micropipette made from G-1 glass capillaries (Narishige). After  
565 injection, the embryo in the uterus was placed between a 5 mm platinum tweezertrode and five 50 ms  
566 square pulses of 25 V with 950 ms intervals were applied with an ECM 830 electroporation system  
567 (both from Harvard Apparatus). We performed randomized electroporations of control or Myt1l-  
568 targeting shRNAs in the right and left uterine horns of several pregnant mice to avoid any technical  
569 effect on the experimental outcome. Then, uterine horns were placed back into the abdominal cavity,  
570 and the abdominal wall of the pregnant mouse was sutured. Embryonic brains were harvested and  
571 dissected 2 days (E15.5) after electroporation for subsequent immunofluorescence processing and  
572 analysis. Brain sections were then co-stained with indicated antibodies and anti-GFP to identify  
573 electroporated cells expressing the indicated knock-down constructs. The distribution of GFP positive  
574 cells as well as the number of GFP and respective marker double positive cells was determined by  
575 dividing the number of GFP positive cells in each layer or the number of double positive cells by the  
576 total number of GFP-positive cells in the entire section, respectively.

577

578 **Electrophysiology:**

579 Electrophysiological recordings were performed from mouse primary hippocampal neurons 14 days  
580 after *in vitro* culture and 11 days upon shRNA-infection or MEF-derived iN cells 21 days after transgene  
581 induction and 14 days after co-culturing on glia following previous protocols<sup>9</sup>. In brief, action potentials  
582 were recorded using current-clamp configuration with pipette solution containing (in mM): 130  
583 KMeSO<sub>3</sub>, 10 NaCl, 2 MgCl<sub>2</sub>, EGTA 0.5 for MEF-iN 1 for primary cultures, CaCl<sub>2</sub> 0.16 for MEF-iN 0.1  
584 for primary cultures, 4 Na<sub>2</sub>ATP, 0.4 NaGTP, 14 Tris-creatine phosphate, and 10 HEPES-KOH (pH  
585 adjusted to 7.3, 310 mOsm). The bath solution contained (in mM): 140 NaCl, 5 KCl, CaCl<sub>2</sub> 2 for MEF-  
586 iN 3 for primary cultures, 1 MgCl<sub>2</sub>, 10 glucose, and 10 HEPES-NaOH (pH 7.4). Membrane potentials  
587 were kept around -60 mV using small holding currents, and step currents were injected to elicit action  
588 potentials. Recordings of the intrinsic and active membrane properties were performed in the presence  
589 of 50 μM picrotoxin, 10 μM CNQX and 50 μM D-AP5 in the bath solution (all from Tocris). The  
590 synaptic current recordings were performed in voltage-clamp mode with internal solution containing (in  
591 mM): 135 CsCl<sub>2</sub>, 1 EGTA, 4 Na<sub>2</sub>ATP, 1 Na-GTP, 1 QX-314, and 10 HEPES-NaOH (pH adjusted to 7.4,  
592 310 mOsm). AMPA-receptor EPSCs were pharmacologically isolated by application of 50 μM  
593 picrotoxin, and were subsequently blocked by addition of 50 μM CNQX. Evoked synaptic responses  
594 were triggered by 1-ms, 1 mA current injection through a local extracellular electrode (FHC concentric  
595 bipolar electrode) with a Model 2100 Isolated Pulse Stimulator (A-M Systems). All recordings were  
596 performed in whole-cell configuration using a Multiclamp 700B amplifier (Molecular Devices). All  
597 average data were analyzed from three or more biological replicates using Clampfit 10.4 (Axon  
598 Instruments).

599

600 **Cell line generation and maintenance:**

601 Mouse embryonic fibroblasts (MEFs) were isolated from wild-type or heterozygous TauEGFP knock-in  
602 mouse embryos at E13.5 (Jackson Laboratories) after removal of all neural cell containing tissues.  
603 Mouse glial cells were isolated from forebrains of wild-type mice (Jackson Laboratories) at postnatal  
604 day two. Both cell types were maintained in MEF media (DMEM; Invitrogen) containing 10% cosmic  
605 calf serum (CCS; Hyclone), beta-mercaptoethanol (Sigma), non-essential amino acids, sodium pyruvate  
606 and penicillin/streptomycin (all from Invitrogen) and passaged three times before experiments. Mouse  
607 neural stem cells (NSCs) were isolated from forebrains at E13.5 or cortex at E14.5 of wild-type mouse  
608 embryos. The cells were maintained on PO-laminin coated tissue culture dishes or as neurospheres in  
609 proliferation medium (DMEM/F12) containing N2 or B27 supplement, penicillin/streptomycin (all from  
610 Invitrogen), and 20 ng/ml EGF, 10 ng/ml FGF (both from Peprotech). Cells were infected and kept in  
611 proliferation medium for 7 days after transgene induction using doxycycline or changed one day after  
612 infection to N3 media (DMEM/F12) containing N2 supplement, B27, 20 μg/ml Insulin,  
613 penicillin/streptomycin (all from Invitrogen) 1 % fetal bovine serum (FBS; Hyclone), and doxycycline  
614 to induce differentiation for 7 days. For primary neuronal cultures the hippocampus of P0 wild-type  
615 mouse pups was isolated and cultured on Matrigel-coated plates (Corning) in MEM supplemented with  
616 B27, glucose, transferrin and 5% FBS. 2 days after plating the medium was supplemented with 2 mM  
617 Ara-C (Sigma) as published previously<sup>29</sup>. Primary myoblasts were isolated and cultured on Collagen-  
618 coated plates (Corning) in DMEM supplemented with 20% FBS and penicillin/streptomycin  
619 (Invitrogen) as described earlier<sup>30</sup>. One day after infection and transgene induction using doxycycline  
620 primary myoblasts were changed to DMEM containing penicillin/streptomycin and 5 % horse serum (all  
621 from Invitrogen) to induce muscle differentiation for 4 days. The media for all cells was changed every  
622 2–3 days for the duration of the experiment and all cells were grown at 37 °C and 5% CO<sub>2</sub>. Cells were  
623 tested negative for mycoplasma contamination.

624

625 **Virus production and infection:**

626 Lentivirus was produced by transfection of lentiviral backbones containing the indicated transgenes  
627 together with third-generation packaging plasmids into HEK293 cells following the Trono laboratory  
628 protocol<sup>31</sup>. Virus was concentrated from culture supernatant by ultra-centrifugation (23000 rpm, 2 h, 4  
629 °C) and cells were infected with three different viral titers. Infected cell populations that were used for  
630 reprogramming and genomic analysis were verified by immunofluorescence to contain approximately  
631 70%-90% transgene-positive cells two days after induction based on immunofluorescence microscopy.  
632

### 633 **Plasmid constructs:**

634 DNA constructs were generated by PCR amplification with Phusion polymerase followed by restriction  
635 digest using indicated enzymes and ligation with T4 DNA ligase (all from NEB). Site directed mutations  
636 of *Myt1l ZF2-3* were generated using the QuikChange Multi Site-Directed Mutagenesis Kit (Agilent  
637 Technologies) following the manufacturer's instructions. A complete list of all constructs and primers  
638 generated in this study can be found in Table S4&6.  
639

### 640 **Protein expression and purification:**

641 Proteins for immunisation and GST pull downs were expressed in *E. coli* Rosetta DE3 (Novagen). All  
642 His- and His-GST-tagged Myt1l fragments were purified under native conditions using Ni-NTA  
643 Agarose (Qiagen) and eluted in bacterial lysis buffer containing (in mM): 20 Tris pH 7.5, 500 NaCl, 1  
644 MgCl<sub>2</sub> supplemented with 400 imidazole (all from Sigma). Eluted proteins were dialysed overnight  
645 against phosphate buffered saline (PBS) and supplemented with 10% glycerol (both from Sigma) prior  
646 to use or storage at -80 °C.  
647

### 648 **Antibodies:**

649 Polyclonal antibodies against Myt1l were raised in rabbits using recombinant His-tagged mmMyt1l  
650 aa170-240. Immune sera were affinity purified against the antigen immobilised on Affigel (Bio-rad) and  
651 eluted in buffer containing (in mM): 100 glycine pH 2.7, 150 NaCl followed by 100 glycine pH 2.2, 150  
652 NaCl. 50 ml anti-Asc11 hybridoma supernatant, 2.5 mg affinity purified anti-Myt1l antibody, and mouse  
653 or rabbit control IgG (Sigma) were coupled to 250 µl protein A Sepharose (GE Healthcare) using buffer  
654 containing (in mM): 20 dimethylpimelimidate in 200 Na<sub>2</sub>B<sub>4</sub>O<sub>7</sub> pH 9, blocked with 1000 Tris pH 8,  
655 followed by 200 ethanolamine pH 8, washed with 200 Na<sub>2</sub>B<sub>4</sub>O<sub>7</sub> pH 9, washed with 200 glycine pH 2.2,  
656 150 NaCl, and finally washed extensively using PBS (all from Sigma). A complete list of all primary  
657 antibodies used in this study can be found in Table S7. Secondary Alexa-conjugated antibodies were  
658 used at 1:2000 (all from Invitrogen), secondary HRP-conjugated antibodies were used at 1:5000 (all  
659 from Jackson Immunoresearch) and secondary IRDye-conjugated antibodies were used at 1:5000 (all  
660 from LI-COR).  
661

### 662 **Immunofluorescence:**

663 Cultured cells were washed with PBS and fixed using 4% paraformaldehyde (PFA: Affymetrix) for 10  
664 min. Cells were then permeabilised in 0.5% Triton X-100 (Sigma) in PBS for 5 min, blocked in a  
665 solution of PBS containing 2% bovine serum albumin (BSA; Sigma) for 1 h, followed by incubation  
666 with primary antibody for 1 h at room temperature or overnight at 4°C. Cells were washed three times  
667 for 15 min using blocking solution prior to incubation for 30 min with secondary antibodies. For DNA  
668 staining 100 ng/ml DAPI was added to the last washing step (Invitrogen). Embryonic mouse brains were

669 dissected and immersion fixed in 4% PFA overnight, while adult mice were transcardially perfused first  
670 with PBS followed by ice cold 4% PFA, then the brains were isolated and post fixed in 4% PFA  
671 overnight. After fixation embryonic and adult brains were cryoprotected overnight in 30% sucrose in  
672 PBS. Embryonic brains were embedded in OCT compound (Sakura), frozen in dry ice, cryostat  
673 sectioned at 20  $\mu\text{m}$  and mounted on glass slides. Adult brains were sectioned at 40  $\mu\text{m}$  using a freezing  
674 sliding microtome. For immunofluorescence, mounted (embryonic) or free-floating (adult) sections were  
675 washed in potassium phosphate buffer (KPBS). Then incubated in KPBS with 0.25% Triton-X100 and  
676 5% normal donkey and goat serum (pre-incubation solution; both from Jackson Immunoresearch) for 1 h  
677 at room temperature followed by primary antibody incubation in pre-incubation solution overnight at  
678 4°C. Following washes in KPBS with 0.25% Triton-X100, sections were incubated with secondary  
679 antibodies and Hoechst (Invitrogen) in pre-incubation solution for 2 h at room temperature. After final  
680 washes in KPBS free-floating sections were mounted on gelatin-coated slides and sealed using glycerol  
681 based mounting media. Microscopy images were obtained using a DM6000 B microscope equipped with  
682 a 20x HCX PL air objective (NA 0.4) and a DFC365 FX digital camera (all from Leica).

683

#### 684 **Immunoprecipitation experiments (IP):**

685 For each immunoprecipitation  $20 \times 10^6$  MEF cells infected with the indicted transgenes two days after  
686 induction were lysed in 1 ml cell lysis buffer containing (in mM): 0.5% Tween-20, 50 Tris pH 7.5, 2  
687 EDTA, 1 DTT, 1 PMSF, 5 NaF (all from Sigma), and complete protease inhibitor (Roche) for 15 min at  
688 4 °C. Nuclei were pelleted by centrifugation (3200 rpm, 1 min, 4 °C) and resuspended in 1 ml NP-40  
689 lysis buffer containing (in mM): 0.5% NP-40, 50 Tris pH 8, 150 NaCl, 2 EDTA, 1 DTT, 1 PMSF, 5  
690 NaF, 5  $\mu\text{g}/\text{ml}$  cytochalasin B (all from Sigma), complete protease inhibitor (Roche), and benzonase  
691 (Merck). Debris was removed by centrifugation (14000 rpm, 10 min, 4 °C) and nuclear lysate was pre-  
692 cleared by incubation with 15  $\mu\text{l}$  uncoupled protein A beads prior to addition with 15  $\mu\text{l}$  antibody  
693 coupled beads for 2 h at 4 °C. After binding the beads were washed extensively in NP-40 lysis buffer  
694 and bound proteins were eluted with SDS-PAGE sample buffer.

695

#### 696 **GST pull-down experiments (GST-PD):**

697 For each pull-down  $20 \times 10^6$  MEF cells were lysed in 1 ml cell lysis buffer containing (in mM): 0.5%  
698 Tween-20, 50 Tris pH 7.5, 2 EDTA, 1 DTT, 1 PMSF, 5 NaF (all from Sigma), and complete protease  
699 inhibitor (Roche) for 15 min at 4 °C. Nuclei were pelleted by centrifugation (3200 rpm, 1 min, 4 °C) and  
700 resuspended in 0.5 ml cell lysis buffer containing 500 mM NaCl, 5  $\mu\text{g}/\text{ml}$  cytochalasin B (Sigma), and  
701 benzonase (Merk). Debris was removed by centrifugation (14000 rpm, 10 min, 4 °C) and nuclear lysate  
702 was diluted with cell lysis buffer 1:1.25 (200 mM NaCl c.f.). 50  $\mu\text{g}$  of GST alone or GST-tagged Myt11  
703 fragments were incubated with 20  $\mu\text{l}$  glutathione Sepharose 4B beads (GE Healthcare) in PBS  
704 supplemented with 2  $\mu\text{g}/\text{ml}$  BSA (Sigma) and complete protease inhibitor (Roche) for 1 h at 4 °C. Beads  
705 were then washed extensively in cell lysis buffer containing 200 mM NaCl prior to addition of diluted  
706 nuclear lysate and incubation for 2 h at 4 °C. After binding the beads were washed extensively in cell  
707 lysis buffer containing 200 mM NaCl and bound proteins were eluted with SDS-PAGE sample buffer.

708

#### 709 **Chromatin immunoprecipitation sequencing (ChIP-seq) and computational analysis:**

710 For each ChIP-seq experiment either 4 brains from wild-type E13.5 mouse embryos or  $20\text{-}40 \times 10^6$   
711 primary cells two days after transgene induction were cross-linked using 1% formaldehyde (EMS) for

712 10 min followed by lysis in 1 ml swelling buffer containing (in mM): 0.5% NP-40, 5 HEPES pH 7.9, 85  
713 KCl, 1 DTT, 1 PMSF (all from Sigma), and complete protease inhibitors (Roche) for 20 min on ice.  
714 Nuclei were pelleted by centrifugation (3200 rpm, 1 min, 4 °C) and lysed in 1 ml lysis buffer containing  
715 (in mM): 1% SDS, 50 Tris pH 8, 10 EDTA, 1 DTT, 1 PMSF (all from Sigma), and complete protease  
716 inhibitors (Roche) for 10 min on ice. Chromatin was sheared using a Bioruptor sonicator (Diagenode)  
717 until DNA was fragmented to 200-500 bp followed by 1:4 dilution with buffer containing (in mM): 1%  
718 Triton X-100, 20 Tris pH 8, 2 EDTA, 150 NaCl, 1 PMSF (all from Sigma), and complete protease  
719 inhibitors (Roche). Diluted lysate was pre-cleared by incubation with 15 µl Staph A cells or 50 µl  
720 protein A beads prior to addition with antibody (20 µg Sin3b or 50 µg HDAC1) or 50 µl antibody  
721 coupled beads (Myt11) overnight at 4 °C, respectively. After binding the antibody coupled beads were  
722 washed extensively in wash buffer containing (in mM): 1% NP-40, 0.05% SDS, 20 Tris pH 8, 250 NaCl,  
723 2 EDTA (all from Sigma), and complete protease inhibitors (Roche). The reactions with uncoupled  
724 antibody were supplemented with 15 µl Staph A cells washed extensively in the following three wash  
725 buffers containing (in mM): 1% Triton X-100, 0.1% SDS, 20 Tris pH 8, 150 NaCl, 2 EDTA; 1% Triton  
726 X-100, 0.1% SDS, 20 Tris pH 8, 500 NaCl, 2 EDTA; and 1% NP-40, 1% DOC, 10 Tris pH 8, 250 LiCl,  
727 1 EDTA. After washing, the bound fraction was eluted in 100 µl elution buffer containing (in mM): 1%  
728 SDS, 50 Tris pH 8, 10 EDTA, 100 PMSF and reversed cross-linked by overnight incubation at 65 °C.  
729 The isolated DNA was RNase (NEB) treated and purified using QIAGEN columns. Libraries were  
730 generated using the NEBNext ChIP-seq Library Prep Master Mix Set for Illumina (NEB) and single-end  
731 sequencing reads (50bp) were generated on Hi-Seq 2000 platforms (Illumina). ChIP-sequence reads are  
732 available on NCBI GEO accession GSE72121. Raw reads were mapped to mouse reference genome  
733 GRCm38/mm10 using bowtie2 (version 2.2.3) allowing maximum one mismatch<sup>32</sup>. Peaks for each  
734 sample were called using MACS2 algorithm (version 2.0.10.20131216)<sup>33</sup> using the shift size values  
735 calculated from the run\_spp.R script from the SPP peak caller<sup>34</sup>. High quality peaks were identified  
736 using IDR2 (<https://github.com/nboley/idr> version 2.0.2). A negative control ChIP was performed as  
737 described above using the Myt11 antibody on rtTA-only infected. Any rtTA peak that overlapped a peak  
738 in any other condition by greater than 50% was excluded from the final analyses. Heatmaps of ChIP-seq  
739 signals were generated around peak summits ( $\pm$  2kb region) using 25 bp sliding windows with the  
740 HOMER suite (version 4.7)<sup>35</sup>. Read histograms, motif analysis, peak annotation, and GO analysis was  
741 also performed using HOMER and PHANTER<sup>28</sup>. Both Bedtools and SAMtools were used for file  
742 processing and format conversions<sup>36,37</sup>. Differential Myt11 localisation was determined using the  
743 DiffBind R package<sup>38</sup>. All ChIP-sequence data was analysed from two or three biological replicates.

744

#### 745 **MNase-seq analysis:**

746 To assess nucleosome occupancy at candidate regions, we utilised a previously reported MEF MNase-  
747 seq dataset (GSE40896)<sup>25</sup>. The raw reads were mapped to GRCm38/mm10 using bowtie (version 1.1.1)  
748 allowing for one mismatch as described<sup>39</sup>. Histograms of read densities for the Myt11 peaks and Ascl1  
749 peaks<sup>8</sup> (lifted over to mm10) were compiled using HOMER.

750

#### 751 **Transcript analysis using RNA-seq and quantitative PCR:**

752 RNA was isolated using Trizol (Invitrogen) and treated with DNase (NEB). For RNA-sequencing,  
753 libraries were prepared following the dUTP protocol<sup>41</sup> and paired-end sequencing reads (100bp) were  
754 generated on Hi-Seq 2000 platforms (Illumina). RNA-sequence reads are available on NCBI GEO

755 accession GSE72121. Raw reads were mapped to mouse reference genome GRCm38/mm10 using  
756 TopHat2 (version 2.0.10)<sup>42</sup> and transcript assembly and differential expression determined using  
757 cufflinks (version 2.1.1) according to the cuffquant pipeline<sup>43</sup>. CummeRbund was used to generate  
758 expression scatterplots and cluster3/treeview were used to generate heatmaps<sup>44-46</sup>. GSEA was  
759 performed using all genesets in the MsigDB database (GSE14012)<sup>47,48</sup>, including a MEF gene signature  
760 that was compiled by taking the genes that were enriched by a factor of 10 in the MEF condition  
761 compared to the iN condition from the Wapinski et al. raw RNA-seq data (Table S3)<sup>8</sup>. Significance for  
762 GSEA profiles were determined by an FDR < 0.25 as described<sup>48</sup>. Cell type specific gene signatures  
763 were derived from the top 10% of the genes unique to the particular cell type<sup>49-52</sup>, excluding any genes  
764 common amongst 4 out of 5 sets to exclude housekeeping genes (Table S3). Odds ratio analysis was  
765 performed using the GeneOverlap R package (version 1.6.0)<sup>27</sup>. For quantitative PCR, RNA was reverse  
766 transcribed using Superscript II (Invitrogen) following the manufacturer's instructions. Quantitative real  
767 time PCR was performed from cDNA templates using the SYBER Green PCR master mix and a  
768 7900HT Fast Real-Time PCR System (Applied Biosystems). Transcript levels were determined after  
769 normalisation against GAPDH using the Relative Expression Software Tool (REST)<sup>26</sup>. A complete list  
770 of real time PCR primers used in this study can be found in Table S6. All RNA-sequence data was  
771 analysed from two biological replicates.

772

#### 773 **SELEX:**

774 Constructs encoding Myt11 DNA-binding domains were generated by gene synthesis (codon optimised,  
775 Genscript) as indicated in Table S5. Clones were transferred to N-terminal thioredoxin hexahistidine  
776 bacterial expression vector (pETG-20A-SBP;<sup>53</sup>) by a Gateway LR reaction (Invitrogen). Proteins were  
777 produced in the *E. coli* Rosetta DE3 pLysS (Novagen), and purified, and HT-SELEX analyses were  
778 performed as described previously<sup>54</sup>. After each SELEX cycle, the selection ligands were sequenced  
779 using Illumina HiSeq 2000 sequencer, and PWM models generated using the seed, cycle and  
780 multinomial model reported in Table S5 as described here<sup>54</sup>.

781

#### 782 **Data availability statement:**

783 ChIP and RNA-sequencing data were deposited on NCBI GEO accession number GSE72121.

784

785 **Supplementary Information References:**

- 786  
787 26. Pfaffl, M. W., Horgan, G. W. & Dempfle, L. Relative expression software tool (REST) for group-  
788 wise comparison and statistical analysis of relative expression results in real-time PCR. *Nucleic*  
789 *Acids Res* **30**, e36 (2002).
- 790 27. Shen, L. GeneOverlap: An R package to test and visualize gene overlaps. (2014).
- 791 28. Mi, H., Muruganujan, A., Casagrande, J. T. & Thomas, P. D. Large-scale gene function analysis  
792 with the PANTHER classification system. *Nature protocols* **8**, 1551–1566 (2013).
- 793 29. Maximov, A., Pang, Z. P., Tervo, D. G. R. & Südhof, T. C. Monitoring synaptic transmission in  
794 primary neuronal cultures using local extracellular stimulation. *Journal of Neuroscience Methods*  
795 **161**, 75–87 (2007).
- 796 30. Springer, M. L., Rando, T. A. & Blau, H. M. Gene delivery to muscle. *Curr Protoc Hum Genet*  
797 **Chapter 13**, Unit13.4 (2002).
- 798 31. Dull, T. *et al.* A third-generation lentivirus vector with a conditional packaging system. *Journal of*  
799 *Virology* **72**, 8463–8471 (1998).
- 800 32. Langmead, B. & Salzberg, S. L. Fast gapped-read alignment with Bowtie 2. *Nat Meth* **9**, 357–359  
801 (2012).
- 802 33. Zhang, Y. *et al.* Model-based analysis of ChIP-Seq (MACS). *Genome Biology* **9**, R137 (2008).
- 803 34. Kharchenko, P. V., Tolstorukov, M. Y. & Park, P. J. Design and analysis of ChIP-seq  
804 experiments for DNA-binding proteins. *Nat Biotechnol* **26**, 1351–1359 (2008).
- 805 35. Heinz, S. *et al.* Simple Combinations of Lineage-Determining Transcription Factors Prime cis-  
806 Regulatory Elements Required for Macrophage and B Cell Identities. **38**, 576–589 (2010).
- 807 36. Li, H. *et al.* The Sequence Alignment/Map format and SAMtools. *Bioinformatics* **25**, 2078–2079  
808 (2009).
- 809 37. Quinlan, A. R. & Hall, I. M. BEDTools: a flexible suite of utilities for comparing genomic  
810 features. *Bioinformatics* **26**, 841–842 (2010).
- 811 38. Ross-Innes, C. S. *et al.* Differential oestrogen receptor binding is associated with clinical outcome  
812 in breast cancer. *Nature* **481**, 389–393 (2012).
- 813 39. Langmead, B., Trapnell, C., Pop, M. & Salzberg, S. L. Ultrafast and memory-efficient alignment  
814 of short DNA sequences to the human genome. *Genome Biology* **10**, R25 (2009).
- 815 40. Ernst, J. & Kellis, M. ChromHMM: automating chromatin-state discovery and characterization.  
816 *Nat Meth* **9**, 215–216 (2012).
- 817 41. Levin, J. Z. *et al.* Comprehensive comparative analysis of strand-specific mRNA sequencing  
818 methods. *Nat Meth* **7**, 709–715 (2010).
- 819 42. Kim, D. *et al.* TopHat2: accurate alignment of transcriptomes in the presence of insertions,  
820 deletions and gene fusions. *Genome Biology* **14**, R36 (2013).
- 821 43. Trapnell, C. *et al.* Differential analysis of gene regulation at transcript resolution with rNA-seq.  
822 *Nat Biotechnol* **31**, 46–53 (2012).
- 823 44. de Hoon, M. J. L., Imoto, S., Nolan, J. & Miyano, S. Open source clustering software.  
824 *Bioinformatics* **20**, 1453–1454 (2004).
- 825 45. Goff, L. A., Trapnell, C. & Kelley, D. CummeRbund: Visualization and Exploration of Cufflinks  
826 High-throughput Sequencing Data. R package version 2.8.2. 1–45 (2014).
- 827 46. Saldanha, A. J. Java Treeview--extensible visualization of microarray data. *Bioinformatics* **20**,  
828 3246–3248 (2004).
- 829 47. Mootha, V. K. *et al.* PGC-1alpha-responsive genes involved in oxidative phosphorylation are  
830 coordinately downregulated in human diabetes. *Nat Genet* **34**, 267–273 (2003).
- 831 48. Subramanian, A. *et al.* Gene set enrichment analysis: a knowledge-based approach for  
832 interpreting genome-wide expression profiles. *Proc Natl Acad Sci USA* **102**, 15545–15550

- 833 (2005).
- 834 49. Trapnell, C. *et al.* Transcript assembly and quantification by RNA-Seq reveals unannotated  
835 transcripts and isoform switching during cell differentiation. *Nat Biotechnol* **28**, 511–515 (2010).
- 836 50. Bao, X. *et al.* A novel ATAC-seq approach reveals lineage-specific reinforcement of the open  
837 chromatin landscape via cooperation between BAF and p63. *Genome Biology* **16**, 284 (2015).
- 838 51. Huang, L. *et al.* Partial Hepatectomy Induced Long Noncoding RNA Inhibits Hepatocyte  
839 Proliferation during Liver Regeneration. *PLoS ONE* **10**, e0132798 (2015).
- 840 52. Zhang, Y. *et al.* An RNA-Sequencing Transcriptome and Splicing Database of Glia, Neurons, and  
841 Vascular Cells of the Cerebral Cortex. *Journal of Neuroscience* **34**, 11929–11947 (2014).
- 842 53. Jolma, A. *et al.* DNA-Binding Specificities of Human Transcription Factors. *Cell* **152**, 327–339  
843 (2013).
- 844 54. Nitta, K. R. *et al.* Conservation of transcription factor binding specificities across 600 million  
845 years of bilateria evolution. *eLife* **4**, (2015).
- 846
